# ***Halothane Attenuation of Calcium Sensitivity in Airway Smooth Muscle***

## ***Mechanisms of Action during Muscarinic Receptor Stimulation***

Dorothee H. Bremerich, M.D.,\* Akihito Hirasaki, M.D.,\* Keith A. Jones, M.D.,† David O. Warner, M.D.‡

**Background:** In airway smooth muscle, muscarinic receptor stimulation is thought to increase calcium ( $\text{Ca}^{2+}$ ) sensitivity via a guanosine 5'-triphosphate (GTP)-binding protein/protein kinase C (PKC)-mediated mechanism. This study tested the hypothesis that halothane reduces  $\text{Ca}^{2+}$  sensitivity during muscarinic receptor stimulation by inhibiting these second messenger pathways.

**Methods:** A  $\beta$ -escin permeabilized canine tracheal smooth muscle preparation was used in which the cytosolic  $\text{Ca}^{2+}$  concentration ( $[\text{Ca}^{2+}]_i$ ) is controlled and the GTP-binding protein/PKC pathways remain intact and can be activated. The muscarinic receptor was activated with acetylcholine plus GTP; the GTP-binding proteins were directly activated with a nonhydrolyzable form of GTP, guanosine 5'-O-(3-thiotriphosphate;  $\text{GTP}\gamma\text{S}$ ); and PKC was directly activated with the PKC agonist phorbol 12,13-dibutyrate (PDBu).

**Results:** Free  $\text{Ca}^{2+}$  caused a concentration-dependent increase in force. Acetylcholine plus GTP significantly decreased the median effective concentration for free  $\text{Ca}^{2+}$  from  $0.52 \pm 0.06 \mu\text{M}$  to  $0.21 \pm 0.02 \mu\text{M}$ , demonstrating an increase in  $\text{Ca}^{2+}$  sensitivity. Halothane ( $0.99 \pm 0.04 \text{ mm}$ , equivalent to approximately 4 minimum alveolar concentration in dogs) significantly attenuated this increase in  $\text{Ca}^{2+}$  sensitivity induced by acetylcholine plus GTP, increasing the median effective concentration for free  $\text{Ca}^{2+}$  from  $0.21 \pm 0.02 \mu\text{M}$  to  $0.31 \pm 0.03 \mu\text{M}$ . However, halothane did not affect the increases in  $\text{Ca}^{2+}$  sensitivity induced by  $\text{GTP}\gamma\text{S}$  or PDBu.

**Conclusions:** Halothane had no effect on increased  $\text{Ca}^{2+}$  sensitivity caused by direct activation of GTP-binding proteins with  $\text{GTP}\gamma\text{S}$  or PKC with PDBu, suggesting that halothane at-

tenuates acetylcholine-induced  $\text{Ca}^{2+}$  sensitization via a mechanism independent of these pathways in  $\beta$ -escin-permeabilized canine tracheal smooth muscle. (Key words:  $\beta$ -escin. Calcium sensitivity. Lung, trachea: canine; smooth muscle. Muscle, smooth: airway, trachea. Pharmacology: acetylcholine; guanosine 5'-triphosphate (GTP); guanosine 5'-O-(3-thiotriphosphate) ( $\text{GTP}\gamma\text{S}$ ); guanosine 5'-O-(2-thiodiphosphate) ( $\text{GDP}\beta\text{S}$ ); halothane; phorbol 12,13-dibutyrate (PDBu). Second messenger systems: GTP-binding proteins; protein kinase C.)

VOLATILE anesthetics are potent bronchodilators, relaxing airway smooth muscle *in vitro* in part by a direct effect on the smooth muscle cell.<sup>1-4</sup> They reduce the cytosolic free calcium concentration ( $[\text{Ca}^{2+}]_i$ )<sup>1-4</sup> and the amount of force produced at a constant  $[\text{Ca}^{2+}]_i$  (*i.e.*, calcium sensitivity<sup>2,3</sup>). Although the mechanisms by which volatile anesthetics decrease  $[\text{Ca}^{2+}]_i$  have been investigated extensively,<sup>1-4</sup> few studies have elucidated the intracellular pathways by which these compounds reduce calcium sensitivity in airway smooth muscle,<sup>5</sup> a potentially important anesthetic mechanism.

Airway smooth muscle contraction produced by muscarinic receptor agonists is mediated by an increase in  $[\text{Ca}^{2+}]_i$ . Calcium binds calmodulin and subsequently increases myosin light chain kinase activity and phosphorylation of the 20-kDa regulatory myosin light chain.<sup>6,7</sup> Contractile force, however, does not depend on the increase in  $[\text{Ca}^{2+}]_i$  alone. Muscarinic receptor agonists also activate a guanosine 5'-triphosphate (GTP)-dependent second messenger cascade that increases  $\text{Ca}^{2+}$  sensitivity<sup>8,9</sup> in permeabilized smooth muscle preparations exposed to calcium. The mechanism of this action is not fully characterized, but there is considerable evidence that GTP-binding proteins<sup>10-18</sup> and protein kinase C (PKC)<sup>19-22</sup> play key roles.

The purpose of the current study was to determine the role of GTP-binding proteins and PKC as potential targets for halothane's action on acetylcholine-induced enhancement of  $\text{Ca}^{2+}$  sensitivity in canine tracheal smooth muscle (CTSM). We used a  $\beta$ -escin-permeabil-

\* Research Fellow.

† Assistant Professor of Anesthesiology.

‡ Associate Professor of Anesthesiology.

Received from the Departments of Anesthesiology, Physiology, and Biophysics, Mayo Clinic and Mayo Foundation, Rochester, Minnesota. Submitted for publication October 3, 1996. Accepted for publication February 13, 1997. Supported in part by grants HL-45532 and HL-54757 from the National Institutes of Health. Presented in part at the American Society of Anesthesiologists annual meeting, October 19-23, 1996, New Orleans, Louisiana.

Address reprint requests to Dr. Jones: Mayo Clinic and Mayo Foundation, 200 First Street SW, Rochester, Minnesota 55905. Address electronic mail to: kjonas@mayo.edu



HALOTHANE AND  $\text{Ca}^{2+}$  SENSITIVITY

ized CTSM preparation in which pores are produced in the sarcolemma, permitting control of  $[\text{Ca}^{2+}]_i$  by manipulation of extracellular  $\text{Ca}^{2+}$  concentration, yet GTP-binding protein and PKC second messenger cascades remain intact and can be activated.<sup>5,23</sup>

## Materials and Methods

### Tissue Preparation

After we received approval from the Institutional Animal Care and Use Committee, and conforming to the Guiding Principles in the Care and Use of Animals as approved by the Council of the American Physiological Society, we anesthetized 33 mongrel dogs (15–25 kg) of either sex with an intravenous injection of pentobarbital (30 mg/kg) and then killed them by exsanguination. A 15- to 20-cm portion of extrathoracic trachea was excised and immersed in chilled physiologic salt solution of the following composition: 110.5 mM NaCl, 25.7 mM  $\text{NaHCO}_3$ , 5.6 mM dextrose, 3.4 mM KCl, 2.4 mM  $\text{CaCl}_2$ , 1.2 mM  $\text{KH}_2\text{PO}_4$ , and 0.8 mM  $\text{MgSO}_4$ . Fat, connective tissue, and the epithelium were removed with tissue forceps and scissors under microscopic observation.

### Experimental Techniques

**Isometric Force Measurements.** Muscle strips (width, 0.1–0.2 mm; length, 3–5 mm; wet weight, 0.05–0.1 mg) were mounted in a 0.1-ml cuvette and continuously perfused at 2 ml/min with physiologic salt solution (at 37°C) aerated with 94% oxygen and 6% carbon dioxide. One end of the strips was anchored with stainless steel microforceps to a stationary metal rod and the other end was anchored with stainless steel microforceps to a calibrated force transducer (model KG4; Scientific Instruments, Heidelberg, Germany). During a 3-h equilibration period, the length of the strips was increased after repeated isometric contractions (lasting 2 or 3 min) induced by 1  $\mu\text{M}$  acetylcholine until the optimal length was obtained. Each strip was maintained at this optimal length and cooled to room temperature (25°C) for the rest of the experiment. These tissues produced isometric forces of 0.8–2.5 mN.

**Permeabilization Procedure.** Muscle strips were permeabilized with  $\beta$ -escin as previously described<sup>12,18,23</sup> and validated in our laboratory.<sup>5</sup>  $\beta$ -Escin creates pores in the sarcolemma, thus allowing substances of small molecular weight, such as  $\text{Ca}^{2+}$ , to diffuse freely across the cell membrane. Accordingly,

$[\text{Ca}^{2+}]_i$  can be manipulated by changing the extracellular  $\text{Ca}^{2+}$  concentration with ethyleneglycol-bis-( $\beta$ -aminoethylether)-N,N,N',N'-tetraacetic acid (EGTA)-buffered solutions in the bathing media. Larger cellular proteins necessary for contraction are preserved and the membrane receptor-coupled second messenger systems thought to regulate  $\text{Ca}^{2+}$  sensitivity, such as GTP-binding proteins and PKC, remain intact and can be activated.<sup>5</sup> Thus effects of halothane on  $\text{Ca}^{2+}$ -calmodulin activation of the contractile proteins can be distinguished from those on the membrane receptor-coupled second messenger systems that regulate  $\text{Ca}^{2+}$  sensitivity.

Muscle strips were permeabilized for 20 min with 100  $\mu\text{M}$   $\beta$ -escin in relaxing solution. The composition of the relaxing solution was 7.5 mM adenosine 5'-triphosphate, disodium salt; 4 mM EGTA; 20 mM imidazole; 1 mM dithiothreitol; 1 nM free  $\text{Ca}^{2+}$ ; 10 mM creatinine phosphate; and 0.1 mg/ml creatinine phosphokinase. The pH was buffered to 7.0 at 25°C with potassium hydroxide; the ionic strength was kept constant at 0.20 M by adjusting the concentration of potassium acetate. After the permeabilization procedure, strips were perfused with relaxing solution for 10 min to wash out the excess  $\beta$ -escin. Calcium ionophore A23187 (10  $\mu\text{M}$ ) was added to the relaxing solution and all subsequent experimental solutions to deplete the sarcoplasmic reticulum  $\text{Ca}^{2+}$  stores. Solutions of various free  $\text{Ca}^{2+}$  concentrations were prepared using the algorithm of Fabiato and Fabiato.<sup>24</sup> In all experimental solutions, the final concentration of dimethyl sulfoxide, used as a vehicle to dissolve compounds insoluble in water, did not exceed 0.01%; at this concentration, dimethyl sulfoxide had no effect on the isometric force development (data not shown).

### Experimental Protocols

Experiments were conducted to determine the effects of halothane on  $\text{Ca}^{2+}$  sensitization induced by muscarinic receptor stimulation with 3  $\mu\text{M}$  acetylcholine plus 10  $\mu\text{M}$  GTP, by direct activation of GTP-binding proteins with a nonhydrolyzable analog of GTP, guanosine 5'-O-(3-thiotriphosphate) (GTP $\gamma$ S) and by direct activation of PKC with the phorbol ester phorbol 12, 13-dibutyrate (PDBu). Previously we found that halothane has no effect on  $\text{Ca}^{2+}$  sensitivity in the absence of muscarinic receptor stimulation,<sup>5</sup> indicating that halothane has no effect on  $\text{Ca}^{2+}$ -calmodulin activation of myosin light chain kinase or the contractile proteins.

Two experimental protocols were performed. In the



first protocol, the effect of agonist-induced  $\text{Ca}^{2+}$  sensitization in the absence and presence of halothane ( $0.99 \pm 0.04$  mm, equivalent to approximately 4 minimum alveolar concentration for dogs expressed as an aqueous concentration in saline, corrected to room temperature<sup>25</sup>) was determined by generating free  $\text{Ca}^{2+}$  concentration-response curves ( $0.001$ – $10$   $\mu\text{M}$ ). These experiments included three tissue sets, one for each agonist. In each tissue set, three permeabilized CTSM strips were prepared and studied concomitantly. One strip of each set was perfused with relaxing solution alone ( $\text{Ca}^{2+}$  alone, control). The other two strips of each set were perfused with relaxing solution containing either  $3$   $\mu\text{M}$  acetylcholine (a concentration causing 80% of its maximal effect on isometric force development at a constant  $[\text{Ca}^{2+}]_i$  in this preparation<sup>5</sup>) plus  $10$   $\mu\text{M}$  GTP to activate muscarinic receptors ( $n = 6$ ),  $3$   $\mu\text{M}$  GTP $\gamma\text{S}$  ( $n = 6$ ), or  $1$   $\mu\text{M}$  PDBu ( $n = 6$ ). One strip was also exposed to halothane. To generate the  $\text{Ca}^{2+}$  concentration-response curves, muscle strips were allowed to contract for 10 min after each increment of free  $\text{Ca}^{2+}$  concentration. After these determinations, strips were perfused with relaxing solution for 10 min, including inorganic phosphate ( $\text{P}_i$ ; 5 mM) to reduce the time required for relaxation by accelerating the rate of cross-bridge detachment<sup>26</sup> and then perfused with relaxing solution for 10 min to remove  $\text{P}_i$ . Isometric force measurements were normalized to those determined in the same tissues in response to  $10$   $\mu\text{M}$  free  $\text{Ca}^{2+}$  at the end of the experiment.

The second experimental protocol was performed to determine the effect of halothane on different intensities of GTP-binding protein or PKC activation. Concentration-response curves for GTP $\gamma\text{S}$  and PDBu were generated at a constant submaximal  $[\text{Ca}^{2+}]_i$  of  $0.1$   $\mu\text{M}$  and  $0.3$   $\mu\text{M}$ , respectively. Preliminary studies showed that force developed in response to PDBu only in the presence of  $\geq 0.1$   $\mu\text{M}$   $[\text{Ca}^{2+}]_i$ . Two pairs of two permeabilized CTSM strips were prepared and the contractile response to increasing concentrations of GTP $\gamma\text{S}$  ( $0.01$ – $31.6$   $\mu\text{M}$ ;  $n = 5$ ) or PDBu ( $0.001$ – $3$   $\mu\text{M}$ ;  $n = 5$ ) was measured. The solutions perfusing one strip of each pair also contained  $0.97 \pm 0.13$  mm halothane. Muscle strips were allowed to contract for 10 min after each increment of concentration, the time for stable contractile responses. Isometric force measurements were normalized to those determined in the same tissues in response to  $10$   $\mu\text{M}$  free  $\text{Ca}^{2+}$ .

**Administration of Halothane.** Halothane was delivered to solutions *via* an on-line calibrated vaporizer.

Each solution was equilibrated with halothane for at least 5 min before being introduced to the system. The concentrations of halothane in the solutions at the cuvette were determined by gas chromatography from anaerobically obtained samples using an electron capture detector (model 5880A; Hewlett-Packard, Waltham, MA) according to the method of Van Dyke and Wood.<sup>27</sup>

**Materials.** Halothane was purchased from Wyeth-Ayerst Laboratories, Inc. (Philadelphia, PA). A23187 was purchased from Molecular Probes, Inc. (Eugene, OR). Adenosine 5'-triphosphate, disodium salt, was purchased from Research Organics, Inc. (Cleveland, OH). All other drugs and chemicals were purchased from Sigma Chemical Company (St. Louis, MO). Stock solutions and all other drugs and chemicals were prepared in distilled water or dimethyl sulfoxide.

**Statistical Analysis.** Data are expressed as mean values  $\pm$  SD;  $n$  represents the number of dogs. All forces were expressed as a percentage of the response to  $10$   $\mu\text{M}$  free  $\text{Ca}^{2+}$  in that strip. Concentration-response curves were compared by nonlinear regression described by Meddings *et al.*<sup>28</sup> In this method, force ( $F$ ) at any concentration of drug  $C$  was given by the equation:

$$F = F_m C / (EC_{50} + C)$$

where  $F_m$  represents the maximal isometric force generated under that condition and  $EC_{50}$  represents the concentration that produces one half of this maximal isometric force for that drug. Nonlinear regression analysis was used to fit values of  $F_m$  and  $EC_{50}$  to data for  $F$  and  $C$  for each condition studied. This method allowed us to compare curves to determine whether they were significantly different and whether this overall difference could be attributed to differences in  $F_m$ ,  $EC_{50}$ , or both parameters. Probability values of 0.05 or less were considered significant.

## Results

### *Effect of Halothane on Free $\text{Ca}^{2+}$ Concentration Response Curves during Muscarinic Receptor Stimulation*

$\text{Ca}^{2+}$  alone caused a concentration-dependent increase in force. Muscarinic receptor stimulation with acetylcholine plus GTP caused a leftward shift of the free  $\text{Ca}^{2+}$  concentration response curves (fig. 1), producing a significant additional force at a constant submaximal  $[\text{Ca}^{2+}]_i$  as compared to the force induced by free  $\text{Ca}^{2+}$  alone



HALOTHANE AND  $\text{Ca}^{2+}$  SENSITIVITY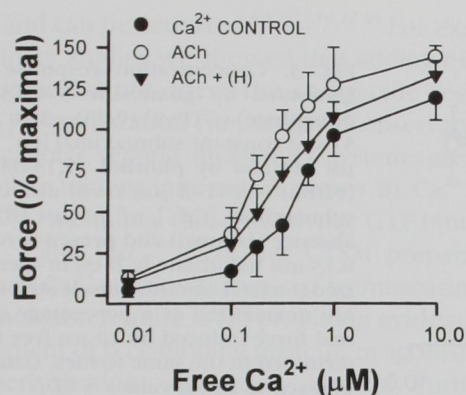

Fig. 1. Free  $\text{Ca}^{2+}$  concentration–response curves generated by free  $\text{Ca}^{2+}$  alone (0.01–10  $\mu\text{M}$ ;  $\text{Ca}^{2+}$  control), and during muscarinic receptor stimulation with 3  $\mu\text{M}$  acetylcholine ( $\text{EC}_{50}$ ) plus 10  $\mu\text{M}$  GTP (ACh) in the absence and presence of 0.99  $\pm$  0.04 mM halothane (ACh + H) in  $\beta$ -escin-permeabilized canine tracheal smooth muscle strips. Values are normalized as a percentage of maximal force induced by 10  $\mu\text{M}$  free  $\text{Ca}^{2+}$  determined in the same tissues. Data are expressed as mean values  $\pm$  SD ( $n = 6$ ).

(i.e., increasing  $\text{Ca}^{2+}$  sensitivity). The concentration of free  $\text{Ca}^{2+}$  required to produce 50% of maximal force ( $\text{EC}_{50}$ ) was significantly decreased by acetylcholine plus GTP from  $0.52 \pm 0.06 \mu\text{M}$  to  $0.21 \pm 0.02 \mu\text{M}$ . In the presence of acetylcholine and GTP, halothane caused a rightward shift of the free  $\text{Ca}^{2+}$  concentration–response curve, significantly increasing the  $\text{EC}_{50}$  for free  $\text{Ca}^{2+}$  from  $0.21 \pm 0.02 \mu\text{M}$  to  $0.31 \pm 0.03 \mu\text{M}$ .

*Effect of Halothane on  $\text{Ca}^{2+}$  Sensitization Induced by Guanosine 5'-O-(3-thiotriphosphate) or Phorbol 12, 13-dibutyrate*

The possible involvement of GTP-binding proteins and PKC in halothane's attenuation of acetylcholine-induced  $\text{Ca}^{2+}$  sensitization was determined during activation with  $\text{GTP}\gamma\text{S}$  and PDBu, respectively. Both  $\text{GTP}\gamma\text{S}$  (fig. 2A) and PDBu (fig. 2B) caused a significant leftward shift of the free  $\text{Ca}^{2+}$  concentration–response curves, reducing the  $\text{EC}_{50}$  for free  $\text{Ca}^{2+}$  from  $0.61 \pm 0.09 \mu\text{M}$  to  $0.16 \pm 0.01 \mu\text{M}$  and from  $0.87 \pm 0.09 \mu\text{M}$  to  $0.29 \pm 0.04 \mu\text{M}$ , respectively. In contrast to its effect on acetylcholine-induced  $\text{Ca}^{2+}$  sensitization, halothane had no effect on this leftward shift of the curves ( $\text{GTP}\gamma\text{S}$ :  $0.16 \pm 0.01 \mu\text{M}$  to  $0.18 \pm 0.02 \mu\text{M}$ ; PDBu:  $0.29 \pm 0.04 \mu\text{M}$  to  $0.29 \pm 0.04 \mu\text{M}$ , respectively).

$\text{GTP}\gamma\text{S}$  (fig. 3A) and PDBu (fig. 3B) increased force at a constant  $[\text{Ca}^{2+}]_i$  of 0.1  $\mu\text{M}$  or 0.3  $\mu\text{M}$  free  $\text{Ca}^{2+}$ , respectively, in a concentration-dependent manner (i.e., enhanced  $\text{Ca}^{2+}$  sensitivity). The  $\text{EC}_{50}$  for  $\text{GTP}\gamma\text{S}$  was

$1.17 \pm 0.31 \mu\text{M}$  and was  $0.21 \pm 0.02 \mu\text{M}$  for PDBu. Halothane had no effect on this increase in  $\text{Ca}^{2+}$  sensitivity over the entire range of the agonist concentrations studied ( $\text{EC}_{50}$  values of  $1.46 \pm 0.25 \mu\text{M}$  for  $\text{GTP}\gamma\text{S}$  and  $0.18 \pm 0.07 \mu\text{M}$  for PDBu).

To confirm the involvement of GTP-binding proteins in acetylcholine-induced  $\text{Ca}^{2+}$  sensitization, the effect of guanosine 5'-O-(2-thiodiphosphate) ( $\text{GDP}\beta\text{S}$ ), a non-hydrolyzable form of GDP that antagonizes GTP-binding protein activation, was studied ( $n = 2$ ). One mM  $\text{GDP}\beta\text{S}$  had no effect on force induced by  $\text{Ca}^{2+}$  alone. Preincubation with 1 mM  $\text{GDP}\beta\text{S}$  in relaxing solution inhibited subsequent force development induced by muscarinic receptor stimulation with 3  $\mu\text{M}$  acetylcholine and 10  $\mu\text{M}$  GTP in the presence of 0.3  $\mu\text{M}$   $[\text{Ca}^{2+}]_i$  by approximately 90%. One mM  $\text{GDP}\beta\text{S}$  added after muscarinic receptor stimulation caused an approximately 65% re-

## 2A

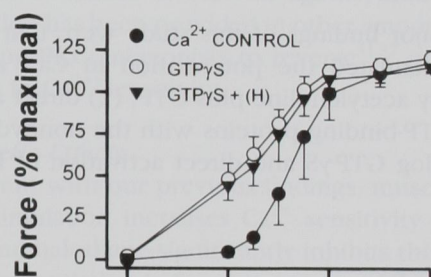

## 2B

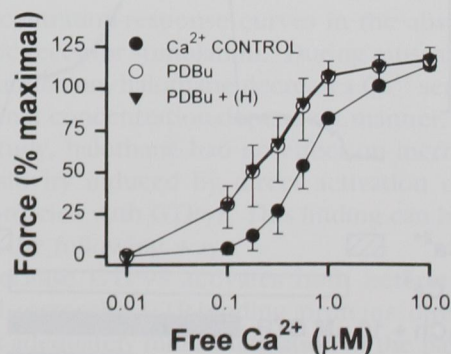

Fig. 2. Free  $\text{Ca}^{2+}$  concentration–response curves (0.01–10  $\mu\text{M}$ ) generated by free  $\text{Ca}^{2+}$  alone ( $\text{Ca}^{2+}$  control) and during activation of GTP-binding proteins with 3  $\mu\text{M}$  guanosine 5'-O-(3-thiotriphosphate) ( $\text{GTP}\gamma\text{S}$ ;  $n = 6$ ) (A) and protein kinase C with 1  $\mu\text{M}$  phorbol 12,13-dibutyrate (PDBu;  $n = 6$ ) (B) in the presence and absence of 0.99  $\pm$  0.04 mM halothane ( $\text{GTP}\gamma\text{S} + \text{H}$ ; PDBu + H, respectively) in  $\beta$ -escin-permeabilized canine tracheal smooth muscle strips. Values are normalized as a percentage of maximal force induced by 10  $\mu\text{M}$  free  $\text{Ca}^{2+}$  determined in the same tissues. Data are expressed as mean values  $\pm$  SD.



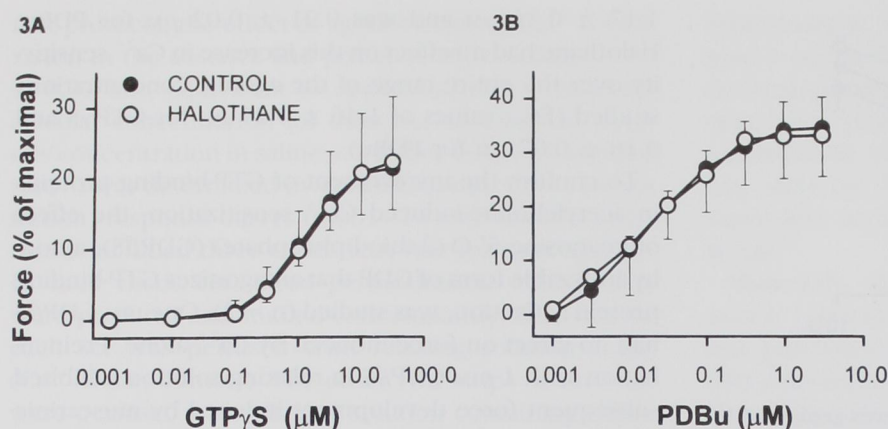

Fig. 3. Concentration-response curves generated by guanosine 5'-O-(3-thiotriphosphate) (GTP $\gamma$ S) (0.001–31.6  $\mu$ M;  $n = 5$ ) at a constant submaximal  $[Ca^{2+}]_i$  of 0.1  $\mu$ M (A) and by phorbol 12,13-dibutyrate (PDBu) (0.001–3  $\mu$ M;  $n=5$ ) at a constant submaximal  $[Ca^{2+}]_i$  of 0.3  $\mu$ M (B) in the absence (control) and presence of  $0.97 \pm 0.13$  mM halothane in  $\beta$ -escin-permeabilized tracheal smooth muscle strips. Values are normalized as a percentage of maximal force induced by 10  $\mu$ M free  $Ca^{2+}$  determined in the same tissues. Data are expressed as mean values  $\pm$  SD.

laxation of the force induced by 3  $\mu$ M acetylcholine and 10  $\mu$ M GTP at 0.3  $\mu$ M  $[Ca^{2+}]_i$  (fig. 4).

## Discussion

The major findings of this study were that (1) halothane attenuated the potentiation in  $Ca^{2+}$  sensitivity caused by acetylcholine plus GTP; (2) direct activation of the GTP-binding proteins with the nonhydrolyzable GTP analog GTP $\gamma$ S and direct activation of PKC with

the phorbol ester PDBu increased  $Ca^{2+}$  sensitivity in a concentration-dependent manner; and (3) halothane had no effect on the increase in  $Ca^{2+}$  sensitivity induced by GTP $\gamma$ S or PDBu.

### Regulation of $Ca^{2+}$ Sensitivity

In many types of smooth muscle, membrane receptor stimulation enhances  $Ca^{2+}$  sensitivity.<sup>2,5,12</sup> In this CTSM preparation, we used acetylcholine plus GTP to submaximally activate  $m_3$  muscarinic receptor subtypes mediating the contractile response.<sup>29</sup> Permeabilized smooth muscle preparations have been used as a tool to investigate the mechanisms regulating  $Ca^{2+}$  sensitivity.<sup>8,9,12,30</sup> Compounds to create these preparations include staphylococcus  $\alpha$ -toxin and the saponin ester  $\beta$ -escin,<sup>9,13,18,31</sup> which produce pores in the plasma membrane. The advantage of these preparations is that  $[Ca^{2+}]_i$  may be manipulated by changing the composition of the extracellular solution bathing the smooth muscle. In the present study,  $[Ca^{2+}]_i$  was clamped by solutions buffered with EGTA, and as a further precaution, all solutions contained the calcium ionophore A23187, which depletes intracellular  $Ca^{2+}$  stores. As verified in permeabilized vascular smooth muscle by electron probe X-ray microanalysis,<sup>9</sup> we previously demonstrated using fura-2 fluorescence measurements in this CTSM preparation that these experimental conditions eliminate intracellular  $Ca^{2+}$  gradients and maintain  $[Ca^{2+}]_i$  constant during muscarinic receptor stimulation.<sup>5</sup> Large cellular proteins necessary for contraction, such as calmodulin, myosin light chain kinase, regulatory myosin light chain, actin, and myosin are preserved, and coupling of membrane receptors to second messenger systems that enhance  $Ca^{2+}$  sensitivity is re-

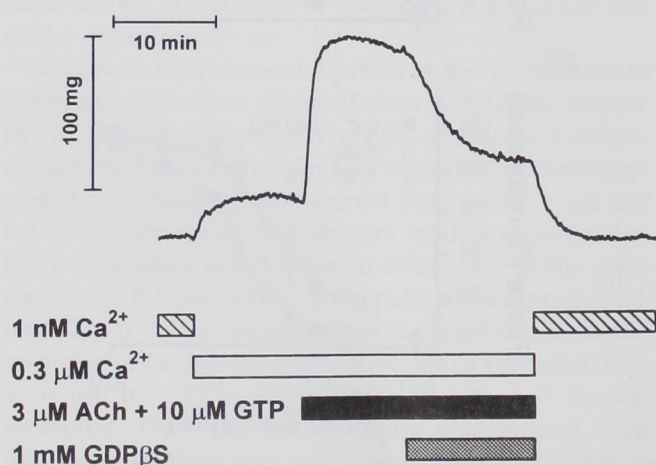

Fig. 4. Representative tracing of the effect of 1 mM guanosine 5'-O-(2-thiodiphosphate) (GDP $\beta$ S) on acetylcholine-induced  $Ca^{2+}$  sensitization in  $\beta$ -escin-permeabilized canine tracheal smooth muscle. Muscarinic receptor stimulation with 3  $\mu$ M acetylcholine ( $EC_{50}$ ) plus 10  $\mu$ M GTP at constant  $[Ca^{2+}]_i$  (0.3  $\mu$ M) caused an increase in isometric force; that is, it enhanced  $Ca^{2+}$  sensitivity. The addition of 1 mM GDP $\beta$ S caused 65% relaxation, expressed as a percentage relative to the force induced by 10  $\mu$ M free  $Ca^{2+}$ .



HALOTHANE AND  $\text{Ca}^{2+}$  SENSITIVITY

tained and can be activated.<sup>5,8,9,12,18,22,30</sup> For example, in preliminary studies we showed that adding exogenous calmodulin did not affect the contractile response in our CTSM preparation (unpublished observation).

Intracellular second messenger systems are thought to regulate agonist-induced increases in  $\text{Ca}^{2+}$  sensitivity,<sup>9,12,13,23</sup> including those involving GTP-binding proteins<sup>10-17</sup> and PKC.<sup>19-22</sup> In our CTSM preparation, increases in  $\text{Ca}^{2+}$  sensitivity induced by muscarinic receptor stimulation require GTP, providing evidence for the involvement of GTP-binding proteins in agonist-induced  $\text{Ca}^{2+}$  sensitization (data not shown). Furthermore,  $\text{GTP}\gamma\text{S}$ , a nonhydrolyzable analog of GTP, mimics<sup>8,11,12,15,17</sup> and  $\text{GDP}\beta\text{S}$ , which competitively prevents the binding of guanine nucleotides to GTP-binding proteins, inhibits<sup>9</sup> agonist-induced  $\text{Ca}^{2+}$  sensitization in various smooth muscle types. We confirmed these findings in the present study, showing that  $\text{GTP}\gamma\text{S}$  produced a concentration-dependent increase in  $\text{Ca}^{2+}$  sensitivity (fig. 3A). In the permeabilized CTSM preparation used,  $\text{GDP}\beta\text{S}$  markedly reversed the acetylcholine-induced contraction at constant submaximal  $[\text{Ca}^{2+}]_i$  (fig. 4). Preincubation with  $\text{GDP}\beta\text{S}$  also inhibited force development induced by acetylcholine plus GTP. In addition, after extensive permeabilization with Triton X-100, the  $\text{Ca}^{2+}$ -sensitizing effect of receptor agonists, GTP and  $\text{GTP}\gamma\text{S}$  is abolished<sup>10,30</sup> (unpublished observation, data not shown).

Two different classes of GTP-binding proteins, heterotrimeric and small, monomeric GTP-binding proteins, are involved in receptor-mediated  $\text{Ca}^{2+}$  sensitization. Both the heterotrimeric<sup>10,16</sup> and small molecular weight cytosolic GTP-binding proteins, such as rhoA p21<sup>10,11,32</sup> or ras p21,<sup>17</sup> are activated by  $\text{GTP}\gamma\text{S}$ . Heterotrimeric GTP-binding proteins induce  $\text{Ca}^{2+}$  sensitization in permeabilized smooth muscle preparations.<sup>10,16</sup> Activated ras p21 GTP-binding proteins mimic the  $\text{Ca}^{2+}$ -sensitizing effect of  $\text{GTP}\gamma\text{S}$  and GTP in guinea pig mesenteric microarteries<sup>17</sup> and adenosine diphosphate ribosylation of the rho family proteins completely abolishes  $\text{GTP}\gamma\text{S}$  and agonist-induced  $\text{Ca}^{2+}$  sensitization in permeabilized porcine aortic smooth muscle cells<sup>32</sup> and guinea pig vas deferens.<sup>16</sup> The current hypothesis suggests that a cascade of GTP-binding proteins may mediate agonist-induced  $\text{Ca}^{2+}$  sensitization, with membrane-bound receptors activating heterotrimeric GTP-binding proteins, which in turn activate small cytosolic GTP-binding proteins that affect downstream effector proteins such as protein phosphatases.

It has been suggested that  $\text{Ca}^{2+}$  sensitizing agonists

acting *via* GTP-binding proteins increase  $\text{Ca}^{2+}$  sensitivity in permeabilized smooth muscle preparations in part by activating PKC.<sup>13,20,21,33</sup> After receptor binding, phospholipase C is activated by a GTP-dependent process, producing diacylglycerol, a physiologic activator of PKC, from phosphatidylinositol biphosphate and phosphatidylcholine.<sup>34</sup> Once activated, PKC may directly or indirectly inhibit the regulatory myosin light chain phosphatases,<sup>35</sup> increasing regulatory myosin light chain phosphorylation and force at a constant  $[\text{Ca}^{2+}]_i$ .<sup>8</sup> This hypothesis is supported by the observation that phorbol esters such as PDBu that activate PKC<sup>36</sup> increase  $\text{Ca}^{2+}$  sensitivity in permeabilized smooth muscle preparations.<sup>16,19,21</sup> We confirmed that PDBu increases  $\text{Ca}^{2+}$  sensitivity in a concentration-dependent manner. In preliminary studies (data not shown), we found that contractions induced by PDBu developed only in the presence of  $[\text{Ca}^{2+}]_i$  of 0.1  $\mu\text{M}$  or greater, suggesting that the majority of PKC isoforms involved in agonist-induced  $\text{Ca}^{2+}$  sensitization are calcium dependent. Further evidence for the involvement of PKC in agonist-induced  $\text{Ca}^{2+}$  sensitization has been provided in other smooth muscle types using PKC antagonists to reverse<sup>31,37</sup> or inhibit<sup>31</sup> increases in  $\text{Ca}^{2+}$  sensitivity.

#### Anesthetic Effects

Consistent with our previous findings, muscarinic receptor stimulation increases  $\text{Ca}^{2+}$  sensitivity in CTSM (fig. 1), and halothane significantly inhibits this agonist-induced potentiation in force at constant  $[\text{Ca}^{2+}]_i$ .<sup>2,5</sup> Previously we showed that halothane does not affect free  $\text{Ca}^{2+}$  concentration-response curves in the absence of muscarinic receptor stimulation.<sup>5</sup> During muscarinic receptor stimulation, halothane decreases  $\text{Ca}^{2+}$  sensitivity in CTSM in a concentration-dependent manner.<sup>5</sup> In the current study, halothane had no effect on increases in  $\text{Ca}^{2+}$  sensitivity induced by direct activation of GTP-binding proteins with  $\text{GTP}\gamma\text{S}$ . This finding can be interpreted in the following ways:

First, because  $\text{GTP}\gamma\text{S}$  activates both heterotrimeric and small, cytosolic GTP-binding proteins directly, it might not adequately mimic activation of the particular GTP-binding proteins involved in acetylcholine-induced  $\text{Ca}^{2+}$  sensitization in airway smooth muscle. For example,  $\text{GTP}\gamma\text{S}$  may activate parallel sensitization pathways not stimulated by acetylcholine.

Second, if the final GTP-binding protein of the signal transduction cascade is activated by  $\text{GTP}\gamma\text{S}$ , any halothane effects on GTP-binding proteins upstream of this target GTP-binding protein may not be detected. For



example, halothane would not be expected to affect the response to GTP $\gamma$ S if it acted to disrupt the coupling between heterotrimeric and small, cytosolic GTP-binding proteins.

Third, halothane could affect processes involving GTP hydrolysis during muscarinic receptor stimulation. Because we used GTP $\gamma$ S, the nonhydrolyzable form of GTP, the results of any such effects would not be observed in our experiments. Therefore, we performed additional experiments investigating the effect of halothane on GTP-induced Ca<sup>2+</sup> sensitization. Halothane (0.89  $\pm$  0.12 mM) had no effect at any GTP concentration studied (0.01–1 mM; experiments performed at a constant [Ca<sup>2+</sup>]<sub>i</sub> of 0.3  $\mu$ M; n = 3), which is similar to results obtained using GTP $\gamma$ S. This finding suggests that halothane's effect on Ca<sup>2+</sup> sensitivity does not depend on GTP hydrolysis.

Finally, when combined with the findings that acetylcholine-induced Ca<sup>2+</sup> sensitization can be attenuated by GDP $\beta$ S and depends on GTP, the lack of halothane's effect on GTP $\gamma$ S-induced Ca<sup>2+</sup> sensitization implies that the site of its action may be the coupling between the muscarinic receptor and GTP-binding proteins. Other studies have also suggested that volatile anesthetics may interfere with GTP-binding protein function.<sup>38–40</sup> Further investigations of this mechanism will require better characterization of GTP-dependent pathways regulating Ca<sup>2+</sup> sensitivity.

In the present study, halothane did not affect PDBu-induced Ca<sup>2+</sup> sensitization. Alterations in PKC activity have been suggested to be a mechanism for general anesthetic effects<sup>3,41–43</sup> in several cell types. Yamakage<sup>3</sup> found that halothane inhibits the enzyme translocation from the cytosol to the plasma membrane during muscarinic receptor stimulation. Because the membrane fraction is thought to be the active form of PKC, Yamakage suggested that inhibition of PKC activity might be responsible for the halothane-induced decrease in Ca<sup>2+</sup> sensitivity. However, because halothane also decreased [Ca<sup>2+</sup>]<sub>i</sub> and because many PKC isoforms are Ca<sup>2+</sup> dependent, halothane's effect on PKC translocation may simply reflect its effect on [Ca<sup>2+</sup>]<sub>i</sub>. We conclude that halothane attenuates Ca<sup>2+</sup> sensitivity in permeabilized CTSM during muscarinic receptor stimulation by acting at a site of the signal transduction prior to any activation of PKC.

In summary, in  $\beta$ -escin-permeabilized CTSM strips, acetylcholine plus GTP, GTP $\gamma$ S, and PDBu each increased Ca<sup>2+</sup> sensitivity at constant submaximal [Ca<sup>2+</sup>]<sub>i</sub>. Halothane significantly inhibited acetylcholine-induced

Ca<sup>2+</sup> sensitization, whereas it had no effect on PDBu- or GTP $\gamma$ S-induced Ca<sup>2+</sup> sensitization. These results suggest that the site of halothane's action may be the coupling between the muscarinic membrane receptor and GTP-binding proteins, implicating a potentially important anesthetic mechanism in airway smooth muscle.

The authors thank Kathy Street and Robert Lorenz for technical assistance and Janet Beckman and Cathy Nelson for preparing the manuscript.

## References

1. Jones KA, Lorenz RR, Morimoto N, Sieck GC, Warner DO: Halothane reduces force and intracellular Ca<sup>2+</sup> in airway smooth muscle independently of cyclic nucleotides. *Am J Physiol* 1995; 268:L166–72
2. Jones KA, Wong GY, Lorenz RR, Warner DO, Sieck GC: Effects of halothane on the relationship between cytosolic calcium and force in airway smooth muscle. *Am J Physiol* 1994; 266:L199–L204
3. Yamakage M: Direct inhibitory mechanisms of halothane on canine tracheal smooth muscle contraction. *ANESTHESIOLOGY* 1992; 77:546–53
4. Yamakage M, Hirshman CA, Croxton TL: Volatile anesthetics inhibit voltage-dependent Ca<sup>2+</sup> channels in porcine tracheal smooth muscle cells. *Am J Physiol* 1995; 268:L187–91
5. Akao M, Hirasaki A, Jones KA, Wong GY, Bremerich DH, Warner DO: Halothane reduces myofilament Ca<sup>2+</sup> sensitivity during muscarinic receptor stimulation of airway smooth muscle. *Am J Physiol* 1996; 271:L719–25
6. Gerthoffer WT, Murphy RA: Myosin phosphorylation and regulation of cross-bridge cycle in tracheal smooth muscle. *Am J Physiol* 1983; 244:C182–7
7. Kamm KE, Stull JT: The function of myosin and myosin light chain kinase phosphorylation in smooth muscle. *Annu Rev Pharmacol Toxicol* 1985; 25:593–620
8. Kitazawa T, Gaylinn BD, Denney GH, Somlyo AP: G-protein-mediated Ca<sup>2+</sup> sensitization of smooth muscle contraction through myosin light chain phosphorylation. *J Biol Chem* 1991; 266:1708–15
9. Kitazawa T, Kobayashi S, Horiuti K, Somlyo AV, Somlyo AP: Receptor-coupled, permeabilized smooth muscle. Role of the phosphatidylinositol cascade, G-proteins, and modulation of the contractile response to Ca<sup>2+</sup>. *J Biol Chem* 1989; 264:5339–42
10. Gong MC, Iizuka K, Nixon G, Browne JP, Hall A, Eccleston JF, Sugai M, Kobayashi S, Somlyo AV, Somlyo AP: Role of guanine nucleotide-binding proteins—ras-family or trimeric proteins or both—in Ca<sup>2+</sup> sensitization of smooth muscle. *Proc Natl Acad Sci* 1996; 93:1340–5
11. Hirata K, Kikuchi A, Sasaki T, Kuroda S, Kaibuchi K, Matsuura Y, Seki H, Saida K, Takai Y: Involvement of rho p21 in the GTP-enhanced calcium ion sensitivity of smooth muscle contraction. *J Biol Chem* 1992; 267:8719–22
12. Kubota Y, Nomura M, Kamm KE, Mumby MC, Stull JT: GTP $\gamma$ S-dependent regulation of smooth muscle contractile elements. *Am J Physiol* 1992; 262:C405–10
13. Nishimura J, Kolber M, van Breemen C: Norepinephrine and



HALOTHANE AND  $\text{Ca}^{2+}$  SENSITIVITY

- GTP- $\gamma$ -S increase myofilament  $\text{Ca}^{2+}$  sensitivity in  $\alpha$ -toxin permeabilized arterial smooth muscle. *Biochem Biophys Res Commun* 1988; 157:677-83
14. Rokolya A, Ahn HY, Moreland S, van Breemen C, Moreland RS: A hypothesis for the mechanism of receptor and G-protein-dependent enhancement of vascular smooth muscle myofilament  $\text{Ca}^{2+}$  sensitivity. *Can J Physiol Pharmacol* 1994; 72:1420-6
  15. Fujiwara T, Itoh T, Kubota Y, Kuriyama H: Effects of guanosine nucleotides on skinned smooth muscle tissue of the rabbit mesenteric artery. *J Physiol (London)* 1989; 408:535-47
  16. Fujita A, Takeuchi T, Nakajima H, Nishio H, Hata F: Involvement of heterotrimeric GTP-binding protein and rho protein, but not protein kinase C, in agonist-induced  $\text{Ca}^{2+}$  sensitization of skinned muscle of guinea pig vas deferens. *J Pharmacol Exp Ther* 1995; 274:555-61
  17. Satoh S, Rensland H, Pfitzer G: Ras proteins increase  $\text{Ca}^{2+}$ -responsiveness of smooth muscle contraction. *FEBS Lett* 1993; 324:211-5
  18. Pfitzer G, Boels PJ: Differential skinning of smooth muscle: a new approach to excitation-contraction coupling. *Blood Vessels* 1991; 28:262-7
  19. Itoh T, Suzuki A, Watanabe Y: Effect of a peptide inhibitor of protein kinase C on G-protein-mediated increase in myofilament  $\text{Ca}^{2+}$ -sensitivity in rabbit arterial skinned muscle. *Br J Pharmacol* 1994; 111:311-7
  20. Itoh T, Kubota Y, Kuriyama H: Effects of a phorbol ester on acetylcholine-induced  $\text{Ca}^{2+}$  mobilization and contraction in the porcine coronary artery. *J Physiol (London)* 1988; 397:401-19
  21. Sato K, Leposavic R, Publicover NG, Sanders KM, Gerthoffer WT: Sensitization of the contractile system of canine colonic smooth muscle by agonists and phorbol ester. *J Physiol (London)* 1994; 481:677-88
  22. Nishimura J, van Breemen C: Direct regulation of smooth muscle contractile elements by second messengers. *Biochem Biophys Res Commun* 1989; 163:929-35
  23. Kobayashi S, Kitazawa T, Somlyo AV, Somlyo AP: Cytosolic heparin inhibits muscarinic and  $\alpha$ -adrenergic  $\text{Ca}^{2+}$  release in smooth muscle. Physiological role of inositol 1,4,5-triphosphate in pharmacomechanical coupling. *J Biol Chem* 1989; 264:17997-18004
  24. Fabiato A, Fabiato F: Calculator programs for computing the composition of the solutions containing multiple metals and ligands used for experiments in skinned muscle cells. *J Physiol Paris* 1979; 75:463-505
  25. Franks NP, Lieb WR: Temperature dependence of the potency of volatile general anesthetics. *ANESTHESIOLOGY* 1996; 84:716-20
  26. Itoh T, Kanmura Y, Kuriyama H: Inorganic phosphate regulates the contraction-relaxation cycle in skinned muscles of the rabbit mesenteric artery. *J Physiol (London)* 1986; 376:231-52
  27. Van Dyke RA, Wood CL: Binding of radioactivity from  $^{14}\text{C}$ -labeled halothane in isolated perfused rat livers. *ANESTHESIOLOGY* 1973; 38:328-32
  28. Meddings JB, Scott RB, Fick GH: Analysis and comparison of sigmoidal curves: application to dose-response data. *Am J Physiol* 1989; 257:G982-9
  29. Brichant J-F, Warner DO, Gunst SJ, Rehder K: Muscarinic receptor subtypes in canine trachea. *Am J Physiol* 1990; 258:L349-54
  30. Kobayashi S, Somlyo AP, Somlyo AV: Guanine nucleotide- and inositol 1,4,5-trisphosphate-induced calcium release in rabbit main pulmonary artery. *J Physiol (London)* 1988; 403:601-19
  31. Nishimura J, Moreland S, Ahn HY, Kawase T, Moreland RS, van Breemen C: Endothelin increases myofilament  $\text{Ca}^{2+}$  sensitivity in  $\alpha$ -toxin-permeabilized rabbit mesenteric artery. *Circ Res* 1992; 71:951-9
  32. Noda M, Yasuda-Fukazawa C, Moriishi K, Kato T, Okuda T, Kurokawa K, Takuwa Y: Involvement of rho in GTP $\gamma$ S-induced enhancement of phosphorylation of 20 kDa myosin light chain in vascular smooth muscle cells: inhibition of phosphatase activity. *FEBS Lett* 1995; 367:246-50
  33. Oishi K, Mita M, Ono T, Hashimoto T, Uchida MK: Protein kinase C-independent sensitization of contractile proteins to  $\text{Ca}^{2+}$  in  $\alpha$ -toxin-permeabilized smooth muscle cells from the guinea-pig stomach. *Br J Pharmacol* 1992; 107:908-9
  34. Nishizuka Y: Intracellular signaling by hydrolysis of phospholipids and activation of protein kinase C. *Science* 1992; 258:607-13
  35. Somlyo AP, Kitazawa T, Himpens B, Matthius G, Horiuti K, Kobayashi S, Goldman YE, Somlyo AV: Modulation of  $\text{Ca}^{2+}$ -sensitivity and of the time course of contraction in smooth muscle: a major role of protein phosphatases? *Adv Prot Phosphatases* 1989; 5:181-95
  36. Blumberg PM, Jaken S, Konig B, Sharkey NA, Leach KL, Jeng AY, Yeh E: Mechanism of action of the phorbol ester tumor promoters: specific receptors for lipophilic ligands. *Biochem Pharmacol* 1984; 33:933-40
  37. Walsh MP, Andrea JE, Allen BG, Clément-Chomienne O, Collins EM, Morgan KG: Smooth muscle protein kinase C. *Can J Physiol Pharmacol* 1994; 72:1392-9
  38. Schmidt U, Schwinger RH, Böhm M: Interaction of halothane with inhibitory G-proteins in the human myocardium. *ANESTHESIOLOGY* 1995; 83:353-60
  39. Morimoto N, Yamamoto K, Jones KA, Warner DO: Halothane and pertussis toxin-sensitive G proteins in airway smooth muscle. *Anesth Analg* 1994; 78:328-34
  40. Durieux ME: Halothane inhibits signaling through m1 muscarinic receptors expressed in *Xenopus* oocytes. *ANESTHESIOLOGY* 1995; 82:174-82
  41. Hemmings HC Jr, Adamo AI: Effects of halothane and propofol on purified brain protein kinase C activation. *ANESTHESIOLOGY* 1994; 81:147-55
  42. Slater SJ, Cox KJ, Lombardi JV, Ho C, Kelly MB, Rubin E, Stubbs CD: Inhibition of protein kinase C by alcohols and anesthetics. *Nature* 1993; 364:82-4
  43. Ozhan M, Sill JC, Atagunduz P, Martin R, Katusic ZS: Volatile anesthetics and agonist-induced contractions in porcine coronary artery smooth muscle and  $\text{Ca}^{2+}$  mobilization in cultured immortalized vascular smooth muscle cells. *ANESTHESIOLOGY* 1994; 80:1102-13
